# Supplementary material
Source: PubMed Central journal article supplement (PMC10526980)

SUPPLEMENTAL DATA 2: Raw Western Blots

Figure 2C

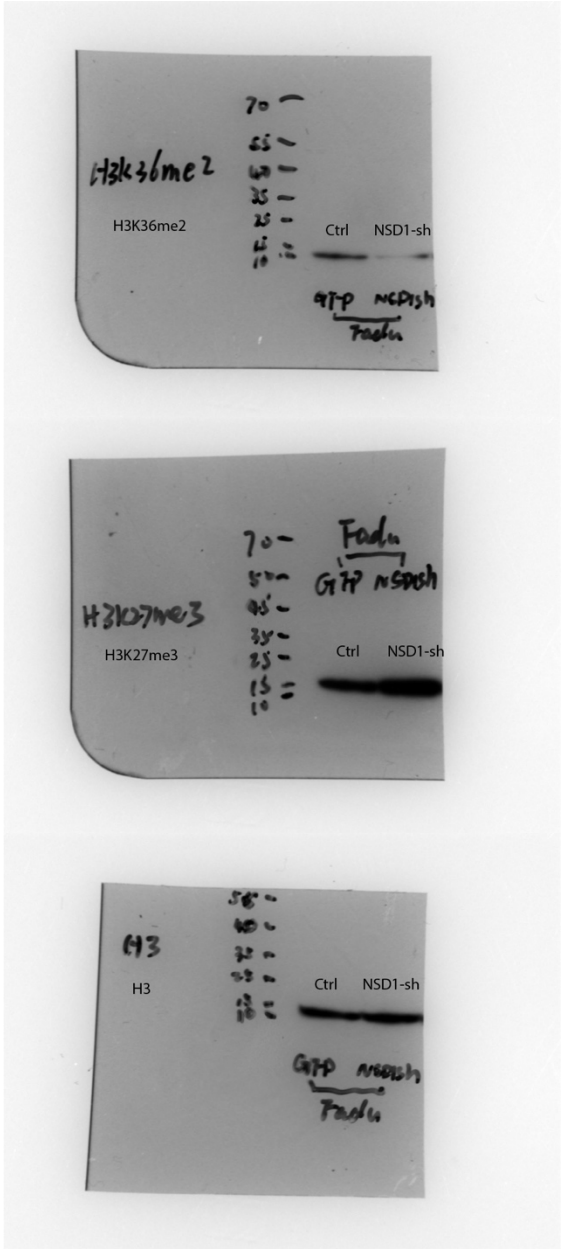

Figure 2D

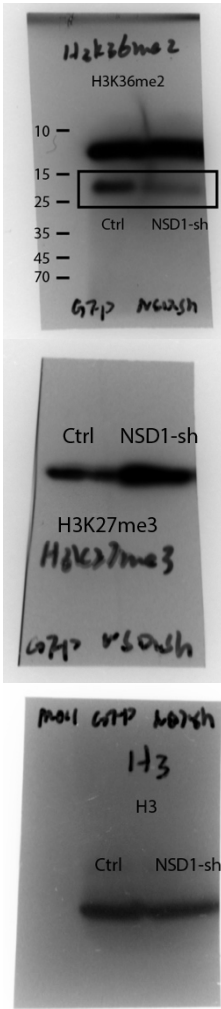

Figure 21

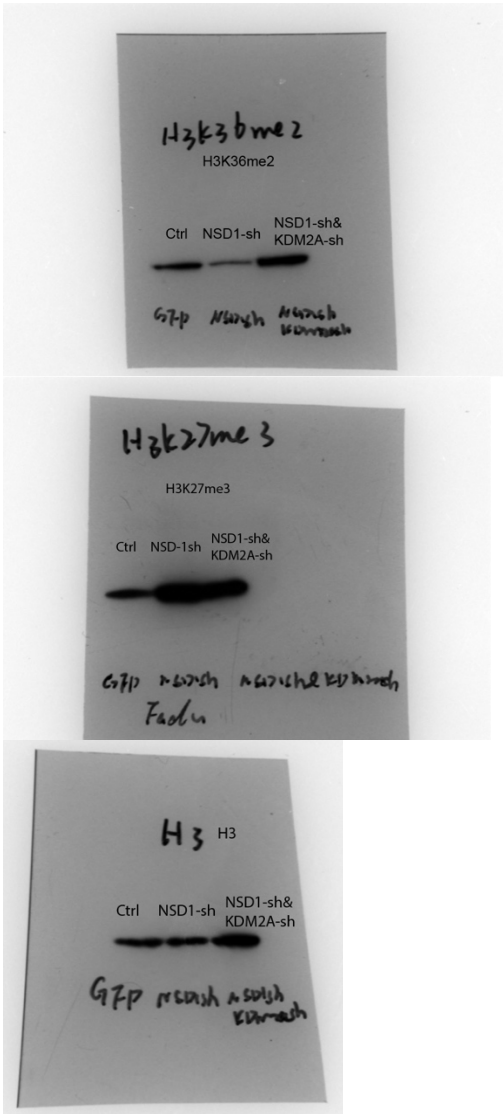

Figure 2J

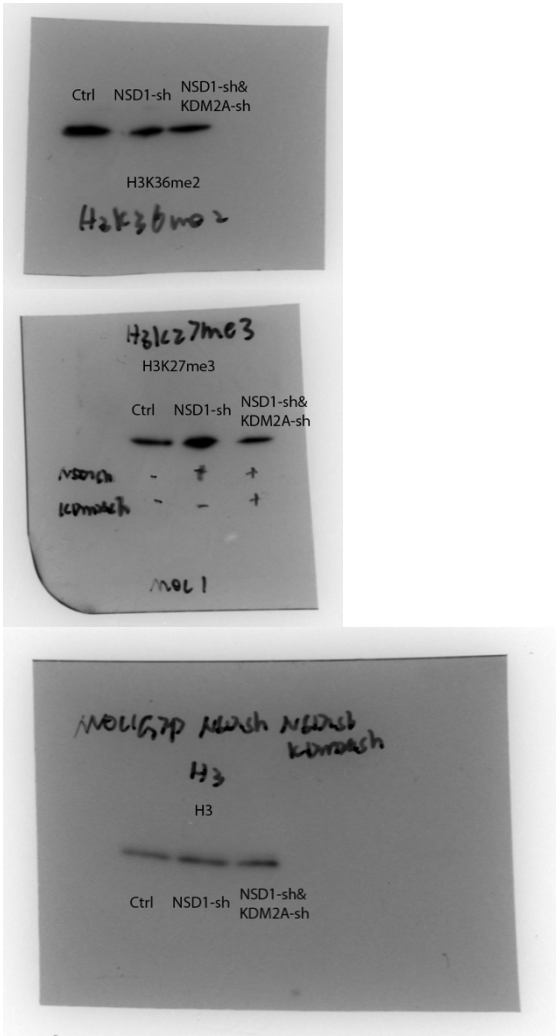

Supp. Figure R1

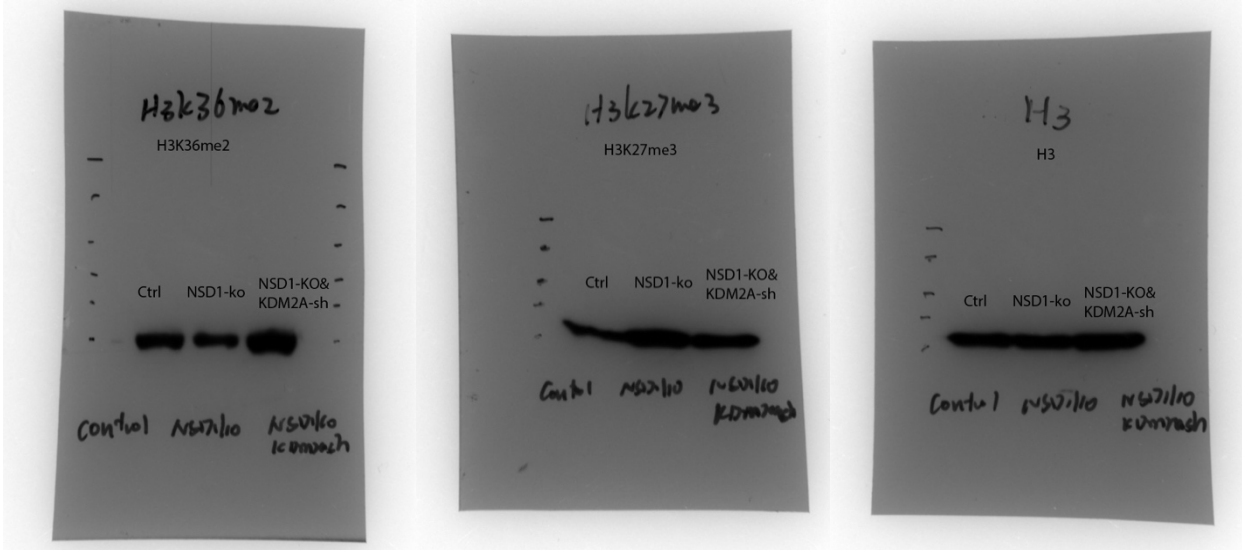

Supplement: NIHMS1910717-supplement-5.pdf [file NIHMS1910717-supplement-5.pdf]
